# Supplementary material for: Physicians’ knowledge and attitudes towards telesurgery and its associated factors in a resource-limited setting, Northwest Ethiopia, 2022: a cross-sectional study design
Source: HighWire-hosted journal article supplement (doi:10.1136/bmjopen-2023-079046), 2024-07-01
Supplement: bmjopen-2023-079046supp002_data_supplement.pdf [file bmjopen-2023-079046supp002_data_supplement.pdf]

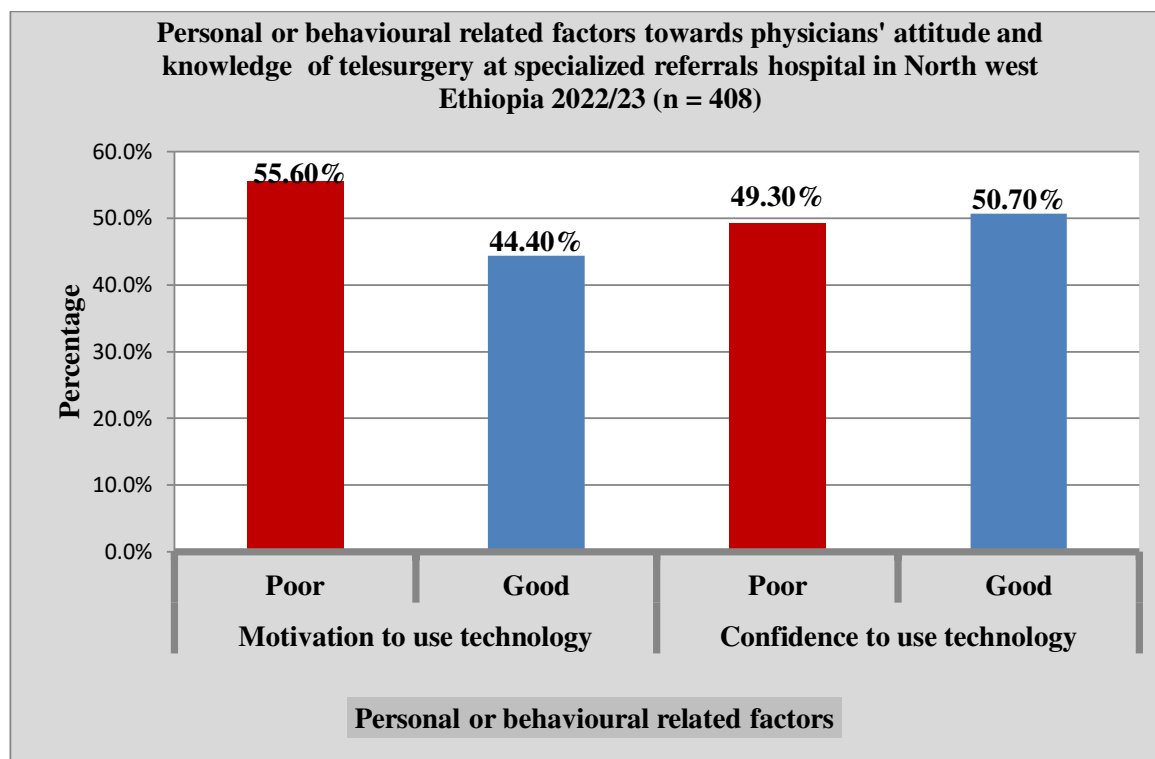

**Figure 4:** Level of Physicians Confidence and Motivation to use new technology among Physicians' in Specialized Referral Hospitals, Amhara Region, Northwest Ethiopia (2022/23) (n=408)

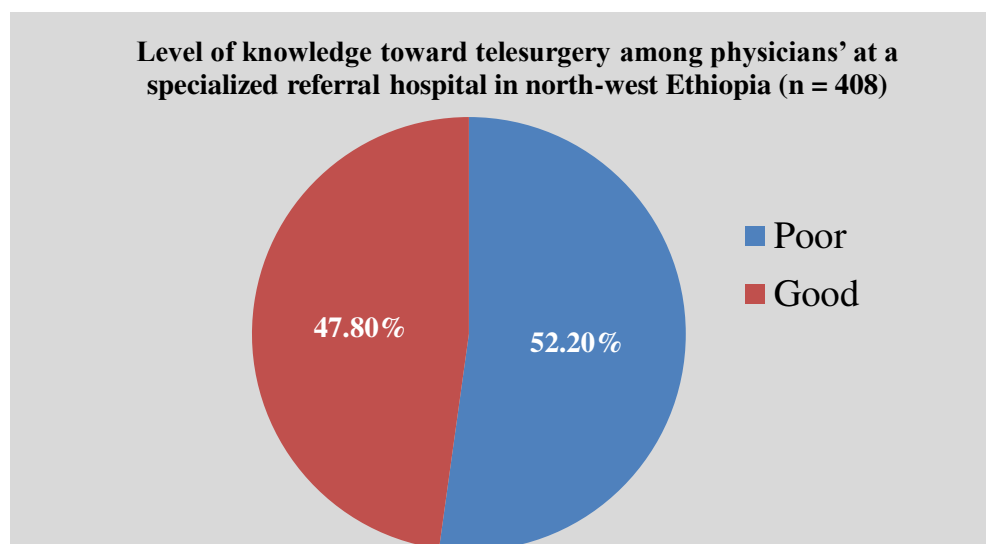

**Figure 5:** Level of Physician Knowledge toward telesurgery in Specialized Referral Hospitals, Amhara Region, Northwest Ethiopia (2022/23) (n=408)
